# Supplementary material for: Optimization of Calcium Fluoride Crystallization Process for Treatment of High-Concentration Fluoride-Containing Semiconductor Industry Wastewater
Source: MDPI journal article supplement (doi:10.3390/ijms25073960), 2024-04-02
Supplement: s1 [file s1]

# Optimization of Calcium Fluoride Crystallization Process for Treatment of High-Concentration Fluoride-Containing Semiconductor Industry Wastewater

Arindam Sinharoy, Ga-Young Lee and Chong-Min Chung \*

Department of Environmental Science & Biotechnology, Jeonju University,  
Jeonju 55069, Republic of Korea

\* Correspondence: cmchung@jj.ac.kr; Tel.: +82-632202286

## Supplementary data

**Table S1.** Composition of silica seed and CaF<sub>2</sub> crystals at different time interval using ICP-OES analysis.

| Elements              | Silica seed | CaF <sub>2</sub> – 5 h | CaF <sub>2</sub> – 40 d |
|-----------------------|-------------|------------------------|-------------------------|
| Sulfate               | 0.14        | 0.24                   | 1.19                    |
| Aluminum              | 0.34        | 0.23                   | 0.42                    |
| Calcium               | 0.34        | 0.28                   | 9.8                     |
| Fluoride              | 1.53        | 1.31                   | 14.71                   |
| Copper                | 0.01        | 0.01                   | 0                       |
| Iron oxide            | 0.7         | 0.45                   | 0.57                    |
| Potassium             | 0.27        | 0.33                   | 0.2                     |
| Magnesium             | 0.12        | 0.08                   | 0.16                    |
| Sodium                | 0.38        | 0.00                   | 0.52                    |
| Phosphate             | 0.13        | 0.31                   | 0.04                    |
| Zinc                  | 0.04        | 0.09                   | 0.01                    |
| Silica (acid soluble) | 0.35        | 0.30                   | 1.18                    |
| Acid insoluble        | 94.46       | 95.27                  | 70                      |
